# Supplementary material
Source: Springer Nature journal article supplement (https://www.springermedizin.de/resource/supplementary/12985_2010_918_MOESM4_ESM.pdf/9608738)

**A.****-log (P-value)**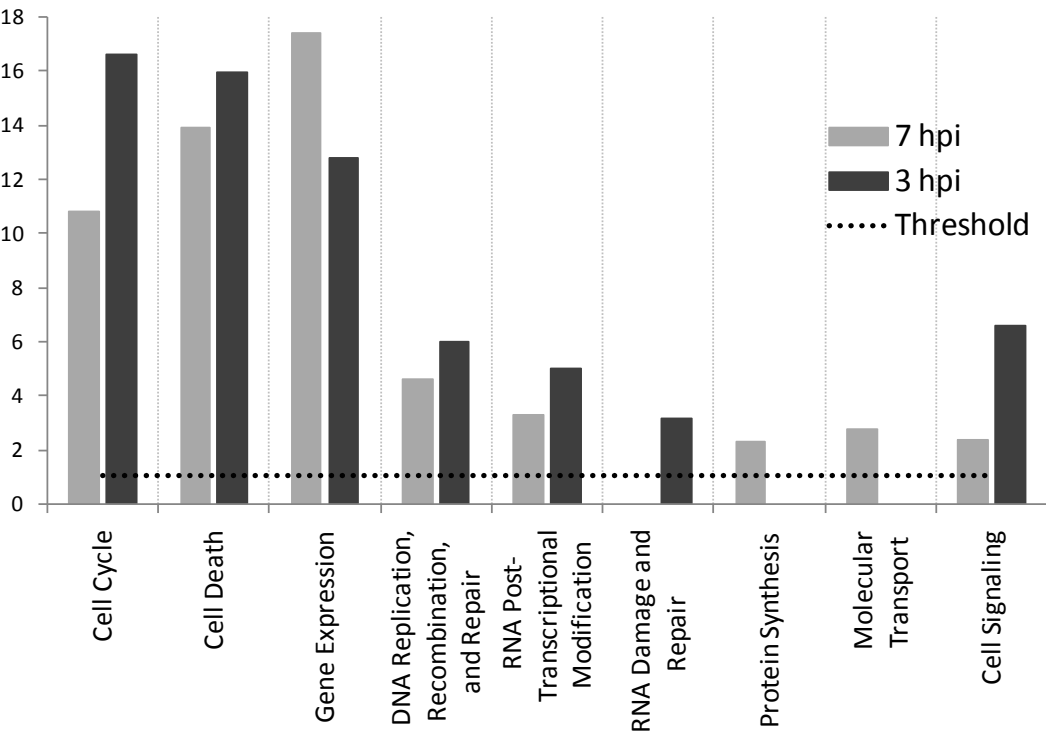**B.****-log (P-value)**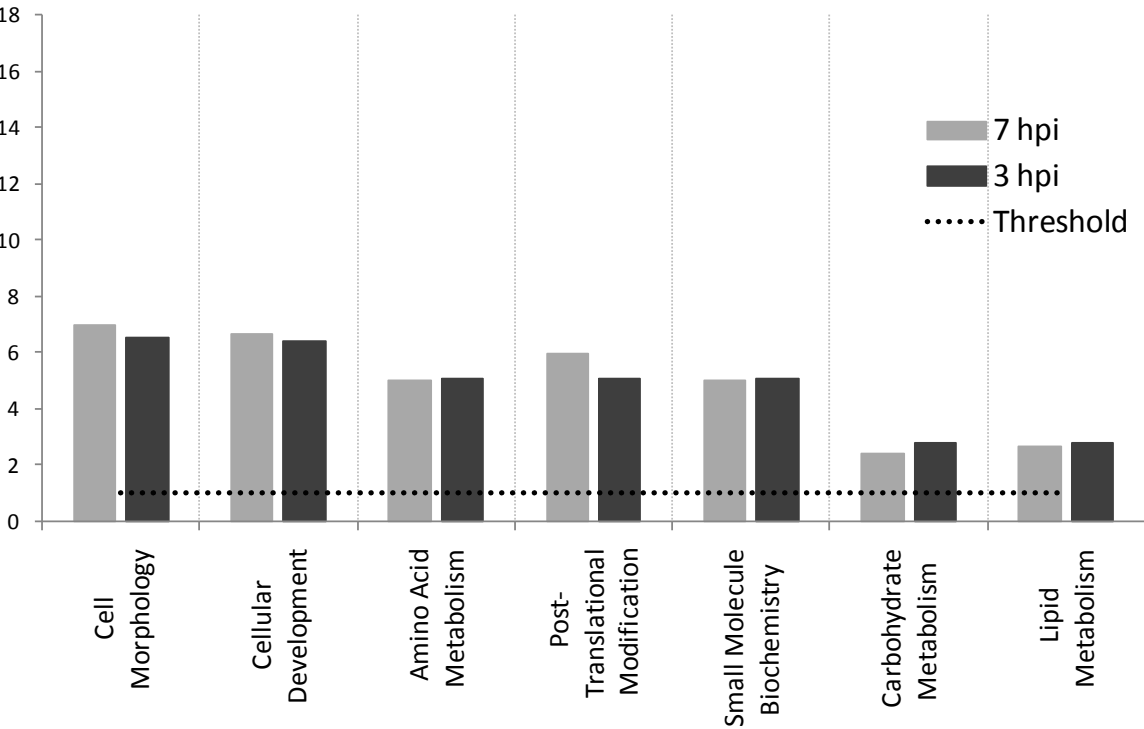

Supplement: MOESM4 [file 9608738]
